# Supplementary material for: Energy Levels in Pentacoordinate d5 to d9 Complexes
Source: MDPI journal article supplement (doi:10.3390/inorganics10080116), 2022-08-12
Supplement: s1 [file s1]

## Supplementary Information

### Energy Levels in Pentacoordinate $d^5$ to $d^9$ Complexes

Ján Titiš, Cyril Rajnák and Roman Boča

Table S1. Reduction and selection rules for  $d^5$  configuration, Fe(III)

| $D_{3h}$ , trigonal bipyramid                    | $C_{4v}$ , square pyramid                    |
|--------------------------------------------------|----------------------------------------------|
| Reduction of IRs on $R_3 \rightarrow D_{3h}$     | Reduction of IRs on $R_3 \rightarrow C_{4v}$ |
| $P \rightarrow A_2'' + E'$                       | $P \rightarrow A_1 + E$                      |
| $D \rightarrow A_1' + E' + E''$                  | $D \rightarrow A_1 + B_1 + B_2 + E$          |
| $G \rightarrow A_1' + A_1'' + A_2'' + 2E' + E''$ | $G \rightarrow 2A_1 + A_2 + B_1 + B_2 + 2E$  |
| Dipole components in $D_{3h}$                    | Dipole components in $C_{4v}$                |
| $A_2'' \in z, E' \in (x, y)$                     | $A_1 \in z, E \in (x, y)$                    |
| Selection rules in $D_{3h}$                      | Selection rules in $C_{4v}$                  |
| 1: $A_1' \otimes E'' = E''$ , (30.6)             | 1: $A_1 \otimes A_2 = A_2$ , (30.3)          |
| 2: $A_1' \otimes A_1'' = A_1''$ , (34.2)         | 1': $A_1 \otimes E = E \in (x, y)$ , 32.5    |
| 2': $A_1' \otimes A_2'' = A_2'' \in z$ , 34.2    | 2: $A_1 \otimes B_2 = B_2$ , (34.1)          |
| 3: $A_1' \otimes E' = E' \in (x, y)$ , 34.5      | 2': $A_1 \otimes E = E \in (x, y)$ , 34.3    |
| 4: $A_1' \otimes E' = E' \in (x, y)$ , 34.8      | 3: $A_1 \otimes B_1 = B_1$ , (34.7)          |
| 5: $A_1' \otimes A_1' = A_1'$ , 34.8             | 3': $A_1 \otimes A_1 = A_1 \in z$ , 34.8     |
|                                                  | 4: $A_1 \otimes A_1 = A_1 \in z$ , 34.8      |

GCF calculations for Fe(III) with  $B = 1122 \text{ cm}^{-1}$ ,  $C = 4712 \text{ cm}^{-1}$ ,  $\xi = 460 \text{ cm}^{-1}$ . All excitation energies are spin forbidden at the weak crystal field.

Hereafter: all weak-field poles  $F_4 = 5000 \text{ cm}^{-1}$  and  $F_2 = 0$ ; numbers refer to excitation energies in units of  $10^3 \text{ cm}^{-1}$ .

| Angular momentum in $D_{3h}$                                 | Angular momentum in $C_{4v}$              |
|--------------------------------------------------------------|-------------------------------------------|
| $A_2' \in L_z, E'' \in L_{x,y}$                              | $A_2 \in L_z, E \in L_{x,y}$              |
| Active excitations                                           | Active excitations                        |
| 1: $A_1' \otimes E'' = E'' \in L_{x,y}$ , 30.6               | 1: $A_1 \otimes A_2 = A_2 \in L_z$ , 30.3 |
| 2: $A_1' \otimes A_1'' = A_1''$ , (34.2)                     | 1': $A_1 \otimes E = E \in (x, y)$ , 32.5 |
| 2': $A_1' \otimes A_2'' = A_2'' \in z$ , 34.2                | 2: $A_1 \otimes B_2 = B_2$ , (34.1)       |
| 3: $A_1' \otimes E' = E'$ , (34.5)                           | 2': $A_1 \otimes E = E \in (x, y)$ , 34.3 |
| 4: $A_1' \otimes E' = E'$ , (34.8)                           | 3: $A_1 \otimes B_1 = B_1$ , (34.7)       |
| 5: $A_1' \otimes A_1' = A_1'$ , (34.8)                       | 3': $A_1 \otimes A_1 = A_1$ , (34.8)      |
|                                                              | 4: $A_1 \otimes A_1 = A_1$ , (34.8)       |
| Excitation energies are in units of $10^3 \text{ cm}^{-1}$ . |                                           |

| Reduction of IRs on $D_{3h} \rightarrow [D_3] \rightarrow D_3'$                        | Reduction of IRs on $C_{4v} \rightarrow C_{4v}'$                   |
|----------------------------------------------------------------------------------------|--------------------------------------------------------------------|
| $A_1 \rightarrow \Gamma_1, S=5/2 \rightarrow 2\Gamma_4 + (\Gamma_5 + \Gamma_6)$        | $A_1 \rightarrow \Gamma_1, S=5/2 \rightarrow \Gamma_6 + 2\Gamma_7$ |
| $\Gamma_1 \otimes (2\Gamma_4 + \Gamma_5 + \Gamma_6) = 2\Gamma_4 + \Gamma_5 + \Gamma_6$ | $\Gamma_1 \otimes (\Gamma_6 + 2\Gamma_7) = \Gamma_6 + 2\Gamma_7$   |
| $E \rightarrow \Gamma_3, S=3/2 \rightarrow \Gamma_4 + (\Gamma_5 + \Gamma_6)$           | $A_2 \rightarrow \Gamma_2, S=3/2 \rightarrow \Gamma_6 + \Gamma_7$  |
| $\Gamma_3 \otimes (\Gamma_4 + \Gamma_5 + \Gamma_6) = 3\Gamma_4 + \Gamma_5$             | $\Gamma_1 \otimes (\Gamma_6 + \Gamma_7) = \Gamma_6 + \Gamma_7$     |

Table S2. Reduction and selection rules for  $d^6$  configuration, Fe(II)

| <b>D<sub>3h</sub>, trigonal bipyramid</b>                 | <b>C<sub>4v</sub>, square pyramid</b>                     |
|-----------------------------------------------------------|-----------------------------------------------------------|
| Reduction of IRs on <b>R<sub>3</sub> → D<sub>3h</sub></b> | Reduction of IRs on <b>R<sub>3</sub> → C<sub>4v</sub></b> |
| $D \rightarrow A'_1 + E' + E''$                           | $D \rightarrow A_1 + B_1 + B_2 + E$                       |
| $H \rightarrow A'_1 + A'_2 + A''_2 + 2E' + 2E''$          | $H \rightarrow 2A_1 + A_2 + B_1 + B_2 + 3E$               |
| Dipole components in <b>D<sub>3h</sub></b>                | Dipole components in <b>C<sub>4v</sub></b>                |
| $A''_2 \in z, E' \in (x, y)$                              | $A_1 \in z, E \in (x, y)$                                 |
| Selection rules in <b>D<sub>3h</sub></b>                  | Selection rules in <b>C<sub>4v</sub></b>                  |
| 1: $E'' \otimes E' = \dots + A''_2 \in z, 3.7$            | 0: $B_2 \otimes E = E \in (x, y), 1.7$                    |
| 2: $E'' \otimes A'_1 = E'', (7.4)$                        | 1: $B_2 \otimes A_1 = B_2, (5.7)$                         |
| 3: $E'' \otimes A''_2 = E' \in (x, y), (16.8)$            | 1': $B_2 \otimes B_1 = A_2, (7.4)$                        |
| 4: $E'' \otimes E' = \dots + A''_2 \in z, (18.9)$         | 2: $B_2 \otimes E = E \in (x, y), (18.0)$                 |
| Transitions 3, 4, etc. are spin forbidden                 | 2': $B_2 \otimes A_1 = B_2, ()$                           |
|                                                           | Transitions 2, 2', etc. are spin forbidden                |

GCF calculations for Fe(II) with  $B = 897 \text{ cm}^{-1}$ ,  $C = 3857 \text{ cm}^{-1}$ ,  $\xi = 400 \text{ cm}^{-1}$ .

| Angular momentum in <b>D<sub>3h</sub></b>                    | Angular momentum in <b>C<sub>4v</sub></b> |
|--------------------------------------------------------------|-------------------------------------------|
| $A'_2 \in L_z, E'' \in L_{x,y}$                              | $A_2 \in L_z, E \in L_{x,y}$              |
| Active excitations                                           | Active excitations                        |
| 1: $E'' \otimes E' = \dots + E'' \in L_{x,y}, 3.7$           | 0: $B_2 \otimes E = E \in L_{x,y}, 1.7$   |
| 2: $E'' \otimes A'_1 = E'' \in L_{x,y}, 7.4$                 | 1: $B_2 \otimes A_1 = B_2, (5.7)$         |
|                                                              | 1': $B_2 \otimes B_1 = A_2 \in L_z, 7.4$  |
| Excitation energies are in units of $10^3 \text{ cm}^{-1}$ . |                                           |

| Reduction of IRs on <b>D<sub>3h</sub> → [D<sub>3</sub>] → D<sub>3</sub>'</b>  | Reduction of IRs on <b>C<sub>4v</sub> → C<sub>4v</sub>'</b>                                                            |
|-------------------------------------------------------------------------------|------------------------------------------------------------------------------------------------------------------------|
| $E'' \rightarrow \Gamma_3, S=2 \rightarrow \Gamma_1 + 2\Gamma_3$              | $B_2 \rightarrow \Gamma_4, S=2 \rightarrow \Gamma_1 + \Gamma_3 + \Gamma_4 + \Gamma_5$                                  |
| $\Gamma_3 \otimes (\Gamma_1 + 2\Gamma_3) = 2\Gamma_1 + 2\Gamma_2 + 3\Gamma_3$ | $\Gamma_4 \otimes (\Gamma_1 + \Gamma_3 + \Gamma_4 + \Gamma_5) = \Gamma_1 + \Gamma_2 + \Gamma_4 + \Gamma_5$             |
| $E' \rightarrow \Gamma_3, S=2 \rightarrow \Gamma_1 + 2\Gamma_3$               | $E \rightarrow \Gamma_5, S=2 \rightarrow \Gamma_1 + \Gamma_3 + \Gamma_4 + \Gamma_5$                                    |
| $\Gamma_3 \otimes (\Gamma_1 + 2\Gamma_3) = 2\Gamma_1 + 2\Gamma_2 + 3\Gamma_3$ | $\Gamma_5 \otimes (\Gamma_1 + \Gamma_3 + \Gamma_4 + \Gamma_5) = \Gamma_1 + \Gamma_2 + \Gamma_3 + \Gamma_4 + 3\Gamma_5$ |

Table S3. Reduction and selection rules for  $d^7$  configuration, Co(II)

| <b>D<sub>3h</sub>, trigonal bipyramid</b>                 | <b>C<sub>4v</sub>, square pyramid</b>                     |
|-----------------------------------------------------------|-----------------------------------------------------------|
| Reduction of IRs on <b>R<sub>3</sub> → D<sub>3h</sub></b> | Reduction of IRs on <b>R<sub>3</sub> → C<sub>4v</sub></b> |
| $P \rightarrow A_2'' + E'$                                | $P \rightarrow A_1 + E$                                   |
| $F \rightarrow A_1' + A_2' + A_2'' + E' + E''$            | $F \rightarrow A_1 + B_1 + B_2 + 2E$                      |
| Dipole components in <b>D<sub>3h</sub></b>                | Dipole components in <b>C<sub>4v</sub></b>                |
| $A_2'' \in z, E' \in (x, y)$                              | $A_1 \in z, E \in (x, y)$                                 |
| Selection rules in <b>D<sub>3h</sub></b>                  | Selection rules in <b>C<sub>4v</sub></b>                  |
| 1a: $A_2'' \otimes A_1' = A_2'' \in z, 2.7$               | 0: $E \otimes A_1 = E \in (x, y), 1.5$                    |
| 1b: $A_2'' \otimes A_2' = A_1', (2.7)$                    | 1: $E \otimes B_1 = E \in (x, y), 3.1$                    |
| 2: $A_2'' \otimes E' = E'', (4.0)$                        | 1': $E \otimes E = \dots + A_1 \in z, 6.1$                |
| 3: $A_2'' \otimes E'' = E' \in (x, y), 10.1$              | 2: $E \otimes B_2 = E \in (x, y), 10.5$                   |
| 4: $A_2'' \otimes E' = E'', (20.0)$                       | 3: $E \otimes A_1 = E \in (x, y), 19.0$                   |
| 4': $A_2'' \otimes A_2' = A_1', (20.2)$                   | 3': $E \otimes E = \dots + A_1 \in z, 19.2$               |

GCF calculations for Co(II) with  $B = 989 \text{ cm}^{-1}$ ,  $C = 4253 \text{ cm}^{-1}$ ,  $\xi = 515 \text{ cm}^{-1}$ .

|                                                           |                                                           |
|-----------------------------------------------------------|-----------------------------------------------------------|
| Reduction of IRs on <b>R<sub>3</sub> → D<sub>3h</sub></b> | Reduction of IRs on <b>R<sub>3</sub> → C<sub>4v</sub></b> |
| $P \rightarrow A_2'' + E'$                                | $P \rightarrow A_1 + E$                                   |
| $F \rightarrow A_1' + A_2' + A_2'' + E' + E''$            | $F \rightarrow A_1 + B_1 + B_2 + 2E$                      |
|                                                           | $D \rightarrow A_1 + B_1 + B_2 + E$                       |
|                                                           | $G \rightarrow 2A_1 + A_2 + B_1 + B_2 + 2E$               |
| Angular momentum in <b>D<sub>3h</sub></b>                 | Angular momentum in <b>C<sub>4v</sub></b>                 |
| $A_2' \in L_z, E'' \in L_{x,y}$                           | $A_2 \in L_z, E \in L_{x,y}$                              |
| Excitations within daughters of F-term                    | Excitations within daughters of F-term                    |
| 1: $A_2'' \otimes A_1' = A_2'', (2.7)$                    | 0: $E \otimes A_1 = E \in L_{x,y}, 1.5$                   |
| 1': $A_2'' \otimes A_2' = A_1'', (2.7)$                   | 1: $E \otimes B_1 = E \in L_{x,y}, 3.2$                   |
| 2: $A_2'' \otimes E' = E'' \in L_{x,y}, 4.0$              | 1': $E \otimes E = \dots + A_2 \in L_z, 6.1$              |
| 3: $A_2'' \otimes E'' = E', (10.1)$                       | 2: $E \otimes B_2 = E \in L_{x,y}, 10.5$                  |
| 4: $A_2'' \otimes E' = E'' \in L_{x,y}, 20.0$             | 3: $E \otimes A_1 = E \in L_{x,y}, 19.0$                  |
|                                                           | 3': $E \otimes E = \dots + A_2 \in L_z, 19.2$             |

|                                                                                          |                                                                                 |
|------------------------------------------------------------------------------------------|---------------------------------------------------------------------------------|
| Reduction of IRs on <b>D<sub>3h</sub> → [D<sub>3</sub>] → D<sub>3</sub>'</b>             | Reduction of IRs on <b>C<sub>4v</sub> → [C<sub>4v</sub>'] → C<sub>4v</sub>'</b> |
| $A_2 \rightarrow \Gamma_2, S=3/2 \rightarrow \Gamma_4 + (\Gamma_5 + \Gamma_6)$           | $E \rightarrow \Gamma_5, S=3/2 \rightarrow \Gamma_6 + \Gamma_7$                 |
| $\Gamma_2 \otimes [\Gamma_4 + (\Gamma_5 + \Gamma_6)] = \Gamma_4 + (\Gamma_6 + \Gamma_5)$ | $\Gamma_5 \otimes (\Gamma_6 + \Gamma_7) = 2\Gamma_6 + 2\Gamma_7$                |
| $A_1 \rightarrow \Gamma_1, S=3/2 \rightarrow \Gamma_4 + (\Gamma_5 + \Gamma_6)$           | $A_1 \rightarrow \Gamma_1, S=3/2 \rightarrow \Gamma_6 + \Gamma_7$               |
| $\Gamma_1 \otimes [\Gamma_4 + (\Gamma_5 + \Gamma_6)] = \Gamma_4 + (\Gamma_5 + \Gamma_6)$ | $\Gamma_1 \otimes (\Gamma_6 + \Gamma_7) = \Gamma_6 + \Gamma_7$                  |

Table S4. Reduction and selection rules for  $d^8$  configuration, Ni(II)

| <b>D<sub>3h</sub>, trigonal bipyramid</b>                 | <b>C<sub>4v</sub>, square pyramid</b>                     |
|-----------------------------------------------------------|-----------------------------------------------------------|
| Reduction of IRs on <b>R<sub>3</sub> → D<sub>3h</sub></b> | Reduction of IRs on <b>R<sub>3</sub> → C<sub>4v</sub></b> |
| $P \rightarrow A_2'' + E'$                                | $P \rightarrow A_1 + E$                                   |
| $F \rightarrow A_1' + A_2' + A_2'' + E' + E''$            | $F \rightarrow A_1 + B_1 + B_2 + 2E$                      |
| Dipole components in <b>D<sub>3h</sub></b>                | Dipole components in <b>C<sub>4v</sub></b>                |
| $A_2'' \in z, E' \in (x, y)$                              | $A_1 \in z, E \in (x, y)$                                 |
| Selection rules in <b>D<sub>3h</sub></b>                  | Selection rules in <b>C<sub>4v</sub></b>                  |
| 1: $E'' \otimes E' = A_1'' + A_2'' + E'' \in z, 5.7$      | 1: $B_2 \otimes E = E \in (x, y), 4.4$                    |
| 2a: $E'' \otimes A_1' = E'' \in (x, y), (7.4)$            | 1': $B_2 \otimes B_1 = A_2 \in (x, y), (7.4)$             |
| 2b: $E'' \otimes A_2' = E'' \in (x, y), (7.4)$            | 2: $B_2 \otimes A_1 = B_2 \in (x, y), (8.7)$              |
| 3: $E'' \otimes A_2'' = E' \in (x, y), 8.9$               | 2': $B_2 \otimes E = E \in (x, y), 9.7$                   |
| 4: $E'' \otimes E' = A_1'' + A_2'' + E'' \in z, 21.1$     | 3: $B_2 \otimes A_1 = B_2 \in (x, y), 22.3$               |
| 4': $E'' \otimes A_2'' = E' \in (x, y), 21.6$             | 3': $B_2 \otimes E = E \in (x, y), 22.6$                  |

GCF calculations for Ni(II) with  $B = 1042 \text{ cm}^{-1}$ ,  $C = 4585 \text{ cm}^{-1}$ ,  $\xi = 630 \text{ cm}^{-1}$ .

|                                                            |                                                           |
|------------------------------------------------------------|-----------------------------------------------------------|
| Reduction of IRs on <b>R<sub>3</sub> → D<sub>3h</sub></b>  | Reduction of IRs on <b>R<sub>3</sub> → C<sub>4v</sub></b> |
| $P \rightarrow A_2'' + E'$                                 | $P \rightarrow A_1 + E$                                   |
| $F \rightarrow A_1' + A_2' + A_2'' + E' + E''$             | $F \rightarrow A_1 + B_1 + B_2 + 2E$                      |
| Angular momentum in <b>D<sub>3h</sub></b>                  | Angular momentum in <b>C<sub>4v</sub></b>                 |
| $A_2' \in L_z, E'' \in L_{x,y}$                            | $A_2 \in L_z, E \in L_{x,y}$                              |
| Excitations within daughters of F-term                     | Excitations within daughters of F-term                    |
| 1: $E'' \otimes E' = A_1'' + A_2'' + E'' \in L_{x,y}, 5.7$ | 1: $B_2 \otimes E = E \in L_{x,y}, 4.4$                   |
| 2a: $E'' \otimes A_1' = E'' \in L_{x,y}, 7.4$              | 1': $B_2 \otimes B_1 = A_2 \in L_z, 7.4$                  |
| 2b: $E'' \otimes A_2' = E'' \in L_{x,y}, 7.4$              | 2: $B_2 \otimes A_1 = B_2 \in (x, y), (8.7)$              |
| 3: $E'' \otimes A_2'' = E' \in (x, y), (8.9)$              | 2': $B_2 \otimes E = E \in L_{x,y}, 9.7$                  |

|                                                                                      |                                                                                                      |
|--------------------------------------------------------------------------------------|------------------------------------------------------------------------------------------------------|
| Reduction of IRs<br>on <b>D<sub>3h</sub> → [D<sub>3</sub>] → D<sub>3</sub>'</b>      | Reduction of IRs<br>on <b>C<sub>4v</sub> → C<sub>4v</sub>'</b>                                       |
| $E \rightarrow \Gamma_3, S=1 \rightarrow \Gamma_2 + \Gamma_3$                        | $B_2 \rightarrow \Gamma_4, S=1 \rightarrow \Gamma_2 + \Gamma_5$                                      |
| $\Gamma_3 \otimes (\Gamma_2 + \Gamma_3) = \Gamma_3 + \Gamma_1 + \Gamma_2 + \Gamma_3$ | $\Gamma_4 \otimes (\Gamma_2 + \Gamma_5) = \Gamma_3 + \Gamma_5$                                       |
| $E \rightarrow \Gamma_3, S=1 \rightarrow \Gamma_2 + \Gamma_3$                        | $E \rightarrow \Gamma_5, S=1 \rightarrow \Gamma_2 + \Gamma_5$                                        |
| $\Gamma_3 \otimes (\Gamma_2 + \Gamma_3) = \Gamma_3 + \Gamma_1 + \Gamma_2 + \Gamma_3$ | $\Gamma_5 \otimes (\Gamma_2 + \Gamma_5)$<br>$= \Gamma_5 + \Gamma_1 + \Gamma_3 + \Gamma_4 + \Gamma_2$ |

Table S5. Reduction and selection rules for  $d^9$  configuration, Cu(II)

| <b>D<sub>3h</sub>, trigonal bipyramid</b>                 | <b>C<sub>4v</sub>, square pyramid</b>                     |
|-----------------------------------------------------------|-----------------------------------------------------------|
| Reduction of IRs on <b>R<sub>3</sub> → D<sub>3h</sub></b> | Reduction of IRs on <b>R<sub>3</sub> → C<sub>4v</sub></b> |
| $D \rightarrow A'_1 + E' + E''$                           | $D \rightarrow A_1 + B_1 + B_2 + E$                       |
| Dipole components in <b>D<sub>3h</sub></b>                | Dipole components in <b>C<sub>4v</sub></b>                |
| $A''_2 \in z, E' \in (x, y)$                              | $A_1 \in z, E \in (x, y)$                                 |
| Selection rules in <b>D<sub>3h</sub></b>                  | Selection rules in <b>C<sub>4v</sub></b>                  |
| 1: $A'_1 \otimes E' = E' \in (x, y)$ , 3.7                | 1: $B_1 \otimes A_1 = B_1$ , (1.7)                        |
| 2: $A'_1 \otimes E'' = E''$ , (7.4)                       | 2: $B_1 \otimes E = E \in (x, y)$ , 5.7                   |
|                                                           | 3: $B_1 \otimes B_2 = A_2$ , (7.4)                        |

GCF calculations for Cu(II) with  $B = 1240 \text{ cm}^{-1}$ ,  $C = 4712 \text{ cm}^{-1}$ ,  $\xi = 830 \text{ cm}^{-1}$ .

|                                                           |                                                           |
|-----------------------------------------------------------|-----------------------------------------------------------|
| Reduction of IRs on <b>R<sub>3</sub> → D<sub>3h</sub></b> | Reduction of IRs on <b>R<sub>3</sub> → C<sub>4v</sub></b> |
| $D \rightarrow A'_1 + E' + E''$                           | $D \rightarrow A_1 + B_1 + B_2 + E$                       |
| Angular momentum in <b>D<sub>3h</sub></b>                 | Angular momentum in <b>C<sub>4v</sub></b>                 |
| $A'_2 \in L_z, E'' \in L_{x,y}$                           | $A_2 \in L_z, E \in L_{x,y}$                              |
| Active excitations                                        | Active excitations                                        |
| 1: $A'_1 \otimes E' = E'$ , (3.7)                         | 1: $B_1 \otimes A_1 = B_1$ (1.7)                          |
| 2: $A'_1 \otimes E'' = E'' \in L_{x,y}$ , 7.4             | 2: $B_1 \otimes E = E \in L_{x,y}$ , 5.7                  |
|                                                           | 3: $B_1 \otimes B_2 = A_2 \in L_z$ , 7.4                  |

  

|                                                                                 |                                                                |
|---------------------------------------------------------------------------------|----------------------------------------------------------------|
| Reduction of IRs<br>on <b>D<sub>3h</sub> → [D<sub>3</sub>] → D<sub>3</sub>'</b> | Reduction of IRs<br>on <b>C<sub>4v</sub> → C<sub>4v</sub>'</b> |
| $A_1 \rightarrow \Gamma_1, S=1/2 \rightarrow \Gamma_4$                          | $B_1 \rightarrow \Gamma_3, S=1/2 \rightarrow \Gamma_6$         |
| $\Gamma_1 \otimes \Gamma_4 = \Gamma_4$                                          | $\Gamma_3 \otimes \Gamma_6 = \Gamma_7$                         |
| $E \rightarrow \Gamma_3, S=1/2 \rightarrow \Gamma_4$                            | $A_1 \rightarrow \Gamma_1, S=1/2 \rightarrow \Gamma_6$         |
| $\Gamma_3 \otimes \Gamma_4 = \Gamma_4 + \Gamma_5$                               | $\Gamma_1 \otimes \Gamma_6 = \Gamma_6$                         |

Table S6. Reduction of the  $(2S + 1)$  states of  $R_3$  and  $R'_3$  to irreducible representations of point groups.

| $S$ or $J$            | 0          | 1/2        | 1                     | 3/2                              | 2                                           | 5/2                               |
|-----------------------|------------|------------|-----------------------|----------------------------------|---------------------------------------------|-----------------------------------|
| For $D_3$ , $D'_3$    | $\Gamma_1$ | $\Gamma_4$ | $\Gamma_2 + \Gamma_3$ | $\Gamma_4 + \Gamma_5 + \Gamma_6$ | $\Gamma_1 + 2\Gamma_3$                      | $2\Gamma_4 + \Gamma_5 + \Gamma_6$ |
| For $D_4$ , $C'_{4v}$ | $\Gamma_1$ | $\Gamma_6$ | $\Gamma_2 + \Gamma_5$ | $\Gamma_6 + \Gamma_7$            | $\Gamma_1 + \Gamma_3 + \Gamma_4 + \Gamma_5$ | $\Gamma_6 + 2\Gamma_7$            |

Table S7. Decomposition of the direct product of irreducible representations  $\Gamma_i \otimes \Gamma_j$  in double groups

a) group  $D'_3$  ( $h = 12$ )<sup>a</sup>

|                            | $\Gamma_1$ | $\Gamma_2$ | $\Gamma_3$                       | $\Gamma_4$                       | $\Gamma_5$ | $\Gamma_6$ |
|----------------------------|------------|------------|----------------------------------|----------------------------------|------------|------------|
| $\Gamma_1 = A_1$           | $\Gamma_1$ | .          | .                                | .                                | .          | .          |
| $\Gamma_2 = A_2$           | $\Gamma_2$ | $\Gamma_1$ | .                                | .                                | .          | .          |
| $\Gamma_3 = E_1$           | $\Gamma_3$ | $\Gamma_3$ | $\Gamma_1, \Gamma_3, (\Gamma_2)$ | .                                | .          | .          |
| $\Gamma_4 = E_{1/2}$       | $\Gamma_4$ | $\Gamma_4$ | $\Gamma_4, \Gamma_5$             | $\Gamma_2, \Gamma_3, (\Gamma_1)$ | .          | .          |
| $\Gamma_5(1) = E_{3/2}(2)$ | $\Gamma_5$ | $\Gamma_6$ | $\Gamma_4$                       | $\Gamma_3$                       | $\Gamma_2$ | .          |
| $\Gamma_6(1) = E_{3/2}$    | $\Gamma_6$ | $\Gamma_5$ | $\Gamma_4$                       | $\Gamma_3$                       | $\Gamma_1$ | $\Gamma_2$ |

<sup>a</sup> Double degenerate representation  $E_{3/2}$  is split into a complex conjugate pair  $\{\Gamma_5 + \Gamma_6\}$ .

b) group  $C'_{4v}$  ( $h = 16$ )

|                         | $\Gamma_1$ | $\Gamma_2$ | $\Gamma_3$ | $\Gamma_4$ | $\Gamma_5$                                 | $\Gamma_6$                       | $\Gamma_7$                       |
|-------------------------|------------|------------|------------|------------|--------------------------------------------|----------------------------------|----------------------------------|
| $\Gamma_1 = A_1$        | $\Gamma_1$ | .          | .          | .          | .                                          | .                                | .                                |
| $\Gamma_2 = A_2$        | $\Gamma_2$ | $\Gamma_1$ | .          | .          | .                                          | .                                | .                                |
| $\Gamma_3 = B_1$        | $\Gamma_3$ | $\Gamma_4$ | $\Gamma_1$ | .          | .                                          | .                                | .                                |
| $\Gamma_4 = B_2$        | $\Gamma_4$ | $\Gamma_3$ | $\Gamma_2$ | $\Gamma_1$ | .                                          | .                                | .                                |
| $\Gamma_5 = E_1$        | $\Gamma_5$ | $\Gamma_5$ | $\Gamma_5$ | $\Gamma_5$ | $\Gamma_1, \Gamma_3, \Gamma_4, (\Gamma_2)$ | .                                | .                                |
| $\Gamma_6 = E_{1/2}(2)$ | $\Gamma_6$ | $\Gamma_6$ | $\Gamma_7$ | $\Gamma_7$ | $\Gamma_6, \Gamma_7$                       | $\Gamma_2, \Gamma_5, (\Gamma_1)$ | .                                |
| $\Gamma_7 = E_{3/2}(2)$ | $\Gamma_7$ | $\Gamma_7$ | $\Gamma_6$ | $\Gamma_6$ | $\Gamma_6, \Gamma_7$                       | $\Gamma_3, \Gamma_4, \Gamma_5$   | $\Gamma_2, \Gamma_5, (\Gamma_1)$ |

New IRs in the double groups are typed on a grey background;  $\Gamma_i \otimes \Gamma_j = \Gamma_j \otimes \Gamma_i$ .

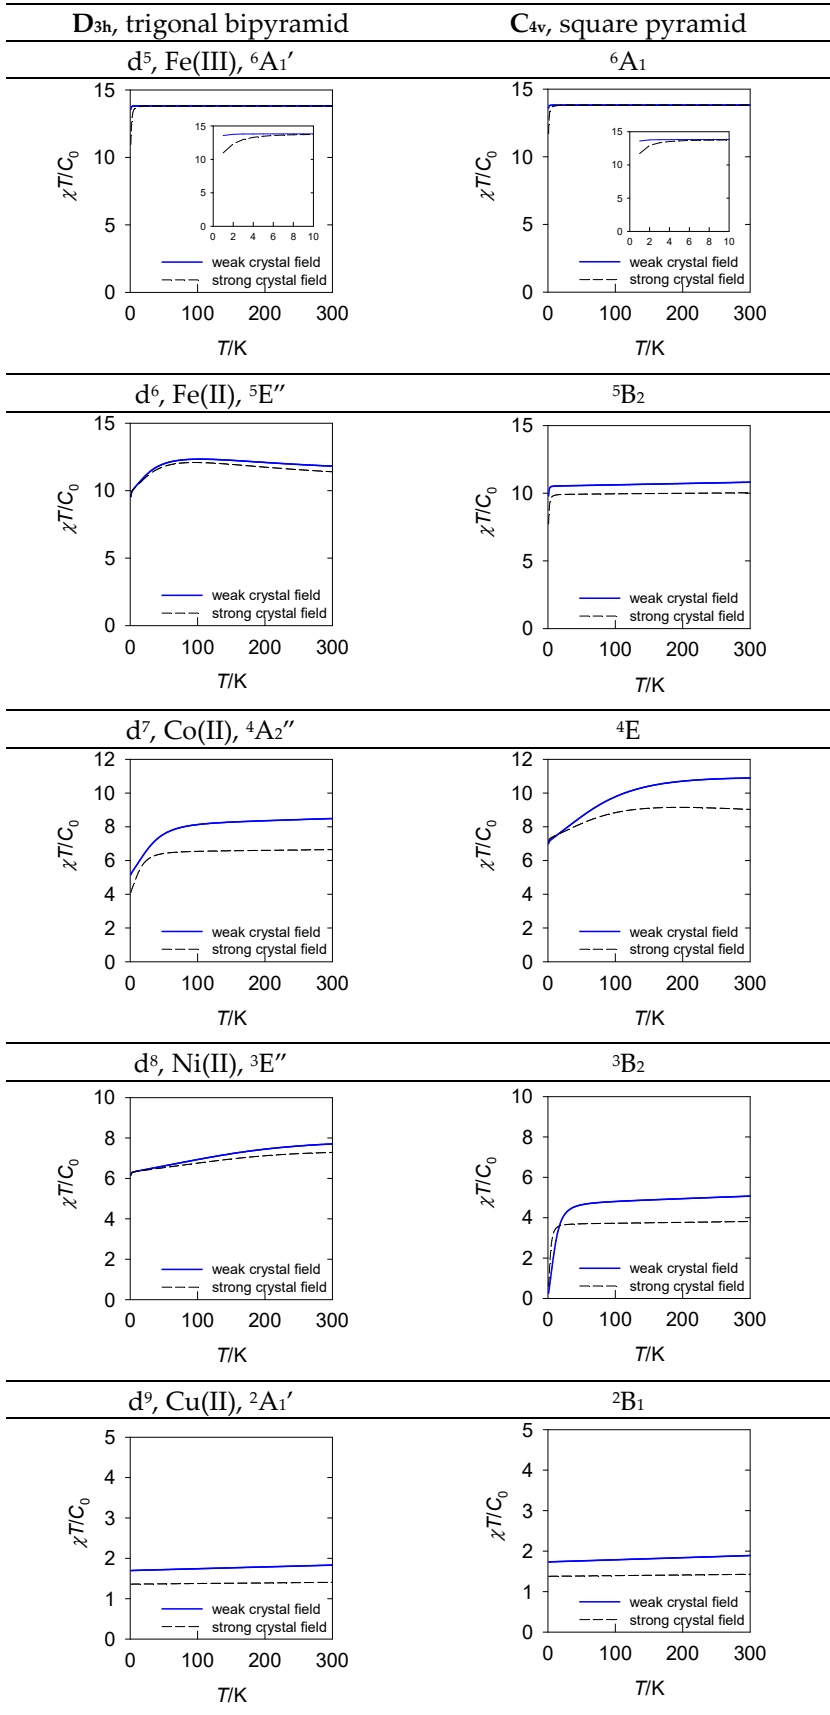

**Figure S1.** DC susceptibility at  $B = 0.1$  T converted to the product function as calculated by GCFT for weak (strong) crystal field with  $F_4 = 5000$  (15000)  $\text{cm}^{-1}$ . Data presented as  $\chi T/C_0$  vs  $T$  [dimensionless]; reduced Curie constant  $C_0 = N_A \mu_0 \mu_B^2 / k_B = 4.714 \times 10^{-6} \text{ m}^3 \text{ K mol}^{-1}$  [SI].

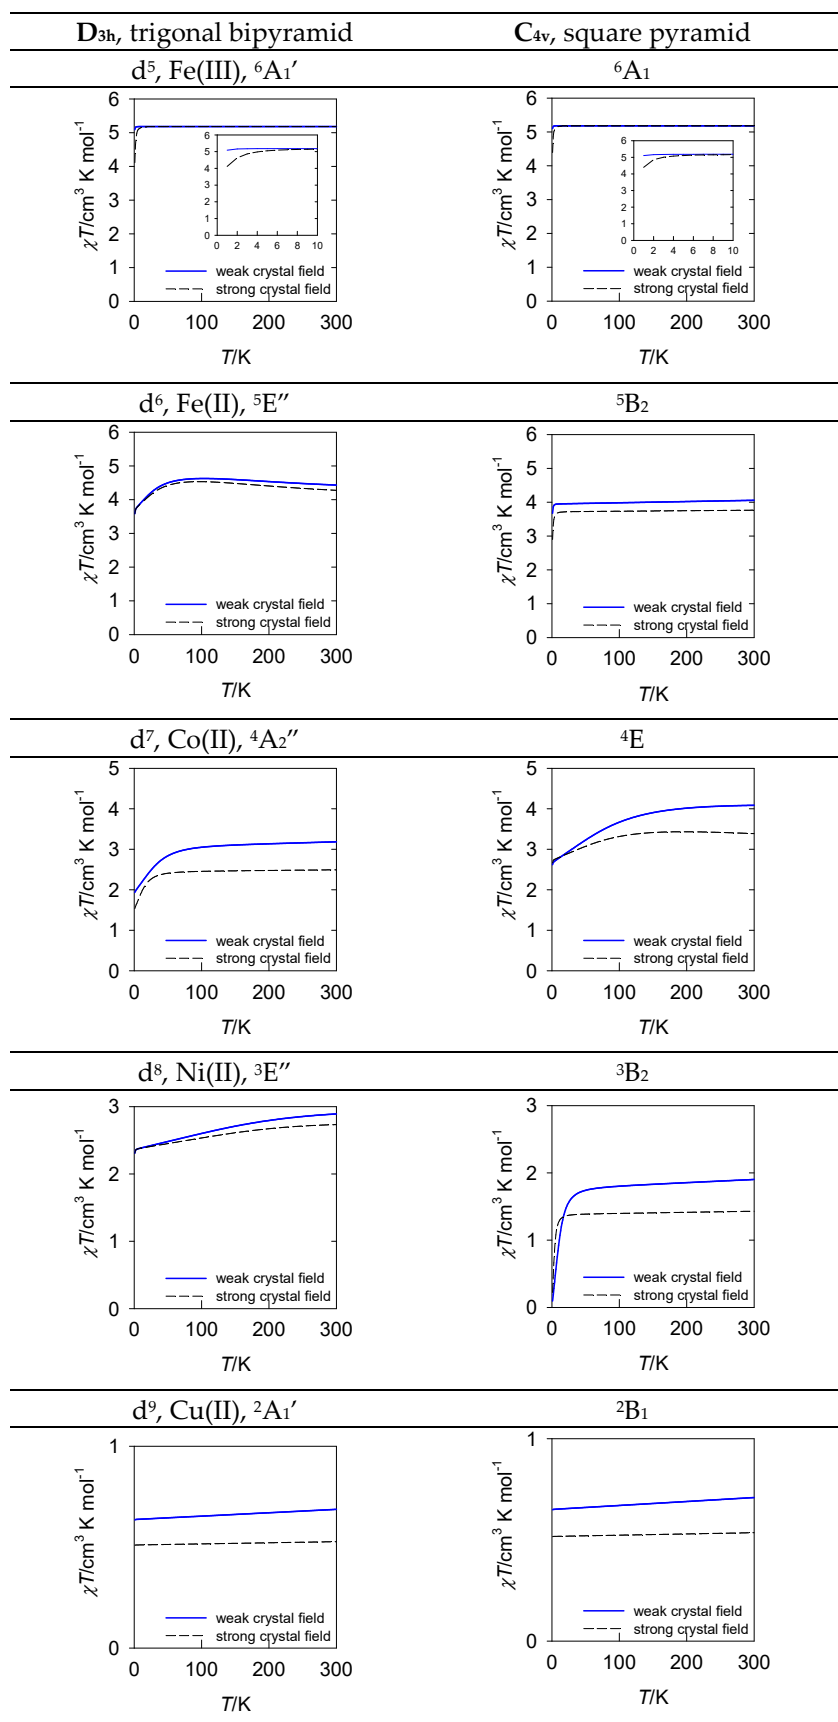

**Figure S2.** DC susceptibility at  $B = 0.1$  T converted to the product function as calculated by GCFT for weak (strong) crystal field with  $F_4 = 5000$  (15000)  $\text{cm}^{-1}$ . Data presented as  $\chi T$  vs  $T$  in  $\text{cm}^3 \text{K mol}^{-1}$  [cgs&emu].



**Table 2.1** Values of  $(4/g^2)\chi T$  as a Function of the Spin  $S$

| $S$ | $(4/g^2)\chi T$<br>(cm <sup>3</sup> K mol <sup>-1</sup> ) |
|-----|-----------------------------------------------------------|
| 1/2 | 0.375                                                     |
| 1   | 1.000                                                     |
| 3/2 | 1.876                                                     |
| 2   | 3.001                                                     |
| 5/2 | 4.377                                                     |
| 3   | 6.002                                                     |
| 7/2 | 7.878                                                     |
